# Supplementary material for: Genome Analysis of Vallitalea guaymasensis Strain L81 Isolated from a Deep-Sea Hydrothermal Vent System
Source: MDPI journal article supplement (doi:10.3390/microorganisms6030063), 2018-07-04
Supplement: s1 [file s1]

Supplementary Table 1. Differential phenotypic characteristics between *A. alkaniphila* strain L81<sup>T</sup> and strain PC1 and the closest relatives within *Vallitalea* spp. and *Natranaerovirga* spp.

Strains: 1. *Abyssivirga alkaniphila* L81<sup>T</sup> (this study); 2. *Abyssivirga alkaniphila* PC1 (this study); 3. *Vallitalea guaymasensis* Ra1766G1<sup>T</sup> (this study); 4. *Vallitalea pronyensis* FatNI3<sup>T</sup> (Ben Aissa et al. 2014); 5. *Natranaerovirga pectinivora* AP3<sup>T</sup> (Sorokin et al. 2012); 6. *Natranaerovirga hydrolytica* APP2<sup>T</sup> (Sorokin et al. 2012). Positive result: +, negative result: -, Weak positive result: (+), No Data: ND

| Characteristic           | 1                | 2            | 3                  | 4  | 5               | 6               |
|--------------------------|------------------|--------------|--------------------|----|-----------------|-----------------|
| Gram stain               | +                | +            | -                  | +  | +               | +               |
| String test              | +                | +            | +                  | ND | ND              | ND              |
| Optimum Temperature (°C) | 37 <sup>st</sup> | 37           | 30-35 <sup>#</sup> | 30 | 43              | 45              |
| Spores                   | -                | -            | -                  | +  | +               | +               |
| Motility                 | +                | +            | +                  | +  | + <sup>st</sup> | + <sup>st</sup> |
| Flagella                 | ND <sup>§</sup>  | Peritrichous | Polar monotrichous | ND | ND              | ND              |
| Utilization of:          |                  |              |                    |    |                 |                 |
| Acetate                  | -                | -            | -                  | -  | +               | +               |
| Arabinose                | +                | +            | +                  | -  | ND              | ND              |
| Fructose                 | +                | -            | (+)                | +  | ND              | +               |
| Pectin                   | +                | -            | +                  | ND | +               | + <sup>st</sup> |
| Pyruvate                 | -                | -            | +                  | ND | ND              | ND              |
| Rhamnose                 | (+)              | (+)          | -                  | +  | ND              | ND              |

<sup>§</sup>Flagella were not detected by the staining method; however, motile cells have been observed using light microscopy.

<sup>#</sup>Data from (Lakhal et al. 2013).

<sup>st</sup>Data from (Schouw et al. 2015).
