# Supplementary material for: Genome Analysis of Vallitalea guaymasensis Strain L81 Isolated from a Deep-Sea Hydrothermal Vent System
Source: MDPI journal article supplement (doi:10.3390/microorganisms6030063), 2018-07-04
Supplement: s1 [file s1]

The table contains proteins mentioned in the article, or represented in supplementary figure 1. Reaction numbers correspond to numbers in supplementary figure 1. Annotations and gene numbers are from RAST.

| Reaction nr. | Pathway                                | Gene                                                                             | Gene number in RAST                         |
|--------------|----------------------------------------|----------------------------------------------------------------------------------|---------------------------------------------|
| 1            | Glycolysis and Gluconeogenesis         | Glucokinase (EC 2.7.1.2)                                                         | 1408, 1611, 2184, 2813                      |
| 2            | Glycolysis and Gluconeogenesis         | Glucose-6-phosphate isomerase (EC 5.3.1.9)                                       | 2206, 2230                                  |
| 3            | Glycolysis and Gluconeogenesis         | 6-phosphofructokinase (EC 2.7.1.11)                                              | 1595, 2201, 2347                            |
| 4            | Glycolysis and Gluconeogenesis         | Fructose-1,6-bisphosphatase, Bacillus type (EC 3.1.3.11)                         | 18, 3733, 3734, 3735, 3737                  |
| 5            | Glycolysis and Gluconeogenesis         | Fructose-bisphosphate aldolase class II (EC 4.1.2.13)                            | 449, 489, 943, 999, 1076, 2204, 3206, 4429  |
| 6            | Glycolysis and Gluconeogenesis         | Triosephosphate isomerase (EC 5.3.1.1)                                           | 2202, 5040                                  |
| 7            | Glycolysis and Gluconeogenesis         | NAD-dependent glyceraldehyde-3-phosphate dehydrogenase (EC 1.2.1.12)             | 5042                                        |
| 8            | Glycolysis and Gluconeogenesis         | Phosphoglycerate kinase (EC 2.7.2.3)                                             | 5041                                        |
| 9            | Glycolysis and Gluconeogenesis         | Non-phosphorylating glyceraldehyde-3-phosphate dehydrogenase (NADP) (EC 1.2.1.9) | 49                                          |
| 10           | Glycolysis and Gluconeogenesis         | 2,3-bisphosphoglycerate-independent phosphoglycerate mutase (EC 5.4.2.1)         | 5039                                        |
| 11           | Glycolysis and Gluconeogenesis         | Enolase (EC 4.2.1.11)                                                            | 5038                                        |
| 12           | Glycolysis and Gluconeogenesis         | Pyruvate kinase (EC 2.7.1.40)                                                    | 540                                         |
| 13           | Glycolysis and Gluconeogenesis         | Phosphoenolpyruvate synthase (EC 2.7.9.2)                                        | 2517, 2533                                  |
| 14           | Glycolysis and Gluconeogenesis         | Pyruvate,phosphate dikinase (EC 2.7.9.1)                                         | 3875                                        |
| 15           | Pentose phosphate pathway              | Ribulose-phosphate 3-epimerase (EC 5.1.3.1)                                      | 3983                                        |
| 16           | Pentose phosphate pathway              | Transketolase (EC 2.2.1.1)                                                       | 2937                                        |
| 16           | Pentose phosphate pathway              | Transketolase, N-terminal section (EC 2.2.1.1)                                   | 376                                         |
| 16           | Pentose phosphate pathway              | Transketolase, C-terminal section (EC 2.2.1.1)                                   | 377                                         |
| 19           | Pentose phosphate pathway              | Ribose 5-phosphate isomerase B (EC 5.3.1.6)                                      | 2295                                        |
| 20           | Pentose phosphate pathway              | Ribose-phosphate pyrophosphokinase (EC 2.7.6.1)                                  | 2360, 3104                                  |
| 21           | Pentose phosphate pathway              | Transaldolase (EC 2.2.1.2)                                                       | 13, 78                                      |
| 22           | TCA cycle                              | Citrate synthase (si) (EC 2.3.3.1)                                               | 335, 3962                                   |
| 23           | TCA cycle                              | Aconitate hydratase (EC 4.2.1.3)                                                 | 334, 3937                                   |
| 24           | TCA cycle                              | Isocitrate dehydrogenase (EC 1.1.1.41)                                           | 332, 3938                                   |
| 25           | TCA cycle                              | 2-Oxoglutarate ferredoxin oxidoreductase (EC 1.2.7.3)                            | 3297, 3298, 3299, 3300                      |
| 26           | TCA cycle                              | Fumarate hydratase (EC 4.2.1.2)                                                  | 2140, 2141                                  |
| 27           | TCA cycle                              | Malate dehydrogenase (EC 1.1.1.37)                                               | 5265                                        |
| 28           | TCA cycle                              | Oxaloacetate decarboxylase, alpha subunit (EC 4.1.1.3)                           | 4129                                        |
| 28           | TCA cycle                              | Oxaloacetate decarboxylase, beta subunit (EC 4.1.1.3)                            | 4128                                        |
| 30           | TCA cycle                              | NADP-dependent Malic enzyme (EC 1.1.1.40)                                        | 5265                                        |
| 31           | TCA cycle                              | Phosphoenolpyruvate carboxykinase (EC 4.1.1.49)                                  | 2172                                        |
| 32           | Pyruvate metabolism                    | Pyruvate:ferredoxin oxidoreductase, delta subunit (EC 1.2.7.1)                   | 1915                                        |
| 32           | Pyruvate metabolism                    | Pyruvate:ferredoxin oxidoreductase, alpha subunit (EC 1.2.7.1)                   | 1914                                        |
| 32           | Pyruvate metabolism                    | Pyruvate:ferredoxin oxidoreductase, beta subunit (EC 1.2.7.1)                    | 1913, 2003                                  |
| 32           | Pyruvate metabolism                    | Pyruvate:ferredoxin oxidoreductase, gamma subunit (EC 1.2.7.1)                   | 1916, 2004                                  |
| 36           | Pyruvate metabolism                    | D-Lactate dehydrogenase (EC 1.1.1.28)                                            | 539                                         |
| 37           | Pyruvate metabolism                    | Pyruvate formate lyase (EC 2.3.1.54)                                             | 600, 1934, 3846, 4626                       |
| 38           | Acetyl-coA metabolism and fermentation | Phosphate acetyltransferase (EC 2.3.1.8)                                         | 3996                                        |
| 39           | Acetyl-coA metabolism and fermentation | Acetate kinase (EC 2.7.2.1)                                                      | 3997                                        |
| 40           | Acetyl-coA metabolism and fermentation | Acetyl-coA synthetase (ADP forming) (EC 6.2.1.13)                                | 3802                                        |
| 41           | Acetyl-coA metabolism and fermentation | Aldehyde dehydrogenase (EC 1.2.1.3)                                              | 1435                                        |
| 42           | Acetyl-coA metabolism and fermentation | Alcohol dehydrogenase (EC 1.1.1.1)                                               | 450, 493, 551, 1162, 1986, 2021, 2114, 4937 |
| 43           | Acetyl-coA metabolism and fermentation | Acetaldehyde dehydrogenase (EC 1.2.1.10)                                         | 450, 493, 2021, 2114                        |
| 44           | Acetyl-coA metabolism and fermentation | Acetyl-coA acetyltransferase (EC 2.3.1.9)                                        | 996, 4817                                   |
| 45           | Acetyl-coA metabolism and fermentation | 3-hydroxybutyryl-coA dehydrogenase (EC 1.1.1.35, EC 1.1.1.157)                   | 1143, 4915                                  |
| 46           | Acetyl-coA metabolism and fermentation | 3-hydroxybutyryl-coA dehydratase (EC 4.2.1.55)                                   | 3681                                        |

|                                                        |                                                                   |                                                                                                    |
|--------------------------------------------------------|-------------------------------------------------------------------|----------------------------------------------------------------------------------------------------|
| 47 Acetyl-coA metabolism and fermentation              | Butyryl-coA dehydrogenase (EC 1.3.8.1)                            | 1149, 3682, 4913                                                                                   |
| 49 Acetyl-coA metabolism and fermentation              | Butyrate kinase (EC 2.7.2.7)                                      | 4112                                                                                               |
| 50 Acetyl-coA metabolism and fermentation              | Butyrate-acetoacetate-coA transferase, subunit alpha (EC 2.8.3.9) | 998, 5205                                                                                          |
| 50 Acetyl-coA metabolism and fermentation              | Butyrate-acetoacetate-coA transferase, subunit beta (EC 2.8.3.9)  | 997, 5206                                                                                          |
| 51 Acetyl-coA metabolism and fermentation              | Phosphotransbutyrylase (EC 2.3.1.9)                               | 4113                                                                                               |
| 52 Fructose to glycolysis                              | Fructokinase (EC 2.7.1.4)                                         | 654, 1622                                                                                          |
| 1 Glucose to glucose-6P                                | Glucokinase (EC 2.7.1.2)                                          | 1408, 1611, 2184, 2813                                                                             |
| 54 Lactose to glucose + galactose                      | Beta-galactosidase (EC 3.2.1.23)                                  | 358, 712, 1354, 1362, 1512, 2246, 2248, 2477, 2808, 3799, 3810, 3811, 4114, 4417, 4427, 4637, 5112 |
| 55 Galactose to galactose-1P                           | Galactokinase (EC 2.7.1.6)                                        | 1903                                                                                               |
| 56 Galactose-1P to glucose-1P                          | Galactose-1-phosphate uridylyltransferase (EC 2.7.7.10)           | 1901                                                                                               |
| 57 Glucose-1P to Glucose-6P                            | Phosphoglucomutase (EC 5.4.2.6)                                   | 865, 2089                                                                                          |
| 68 sucrose to fructose + glucose, maltose to 2xglucose | Alpha-glucosidase (EC 3.2.1.20)                                   | 721                                                                                                |
| 59 sucrose to fructose + glucose-1P                    | Sucrose phosphorylase (EC 2.4.1.7)                                | 1620                                                                                               |
| 60 maltose to glucose + glucose-1P                     | Maltose phosphorylase (EC 2.4.1.8)                                | 1510, 2093, 2793, 2794, 3456, 3834                                                                 |
| 61 palatinose (isomaltulose) to glucose                | 4-alpha-glucanotransferase (amylomaltase) (EC 2.4.1.25)           | 1746                                                                                               |
| 62 mannose-6P to fructose-6P                           | oligo-1,6-glucosidase (EC 3.2.1.10)                               | 1608                                                                                               |
| 63 Cellobiose                                          | mannose-6-phosphate isomerase (EC 5.3.1.8)                        | 1614, 1792, 2197                                                                                   |
| 64 Cellulose                                           | Beta-glucosidase (EC 3.2.1.21)                                    | 986, 3151, 5078, 5190                                                                              |
| 65 starch, glucogen                                    | Endoglucanase (EC 3.2.1.4)                                        | 3524                                                                                               |
| 66 starch, glucogen                                    | Glycogen phosphorylase (EC 2.4.1.1)                               | 1726                                                                                               |
| 67 Starch                                              | 1,4-alpha-glucan branch enzyme (EC 2.4.1.18)                      | 323                                                                                                |
| 68 starch                                              | Alpha-amylase (EC 3.2.1.1)                                        | 4944                                                                                               |
| 69 Dextrin                                             | Alpha-glucosidase (EC 3.2.1.20)                                   | 721                                                                                                |
| 70 xylan                                               | Glucoamylase (EC 3.2.1.3)                                         | 1591                                                                                               |
| 71 xylan                                               | Alpha-xylosidase (EC 3.2.1.-)                                     | 1739, 4625                                                                                         |
| 72 xylan                                               | Alpha-arabinofuranosidase (EC 3.2.1.55)                           | 2500, 4416                                                                                         |
|                                                        | Endo-1,4-beta-xylanase (EC 3.2.1.8)                               | 513, 2483                                                                                          |
| 73 Xylose                                              | xylose isomerase (EC 5.3.1.5)                                     | 4685                                                                                               |
| 74 Xylose                                              | xylulose kinase (EC 2.7.1.17)                                     | 940, 3432, 4683, 5091                                                                              |
| 75 Ribulose                                            | Ribulokinase (EC 2.7.1.16)                                        | 1360, 2663                                                                                         |
| 76 L-ribulose                                          | L-ribulose-5-phosphate 4-epimerase (EC 5.1.3.4)                   | 2664                                                                                               |
| 77 Ribose                                              | Ribokinase (EC 2.7.1.15)                                          | 1431, 2018, 2843                                                                                   |
| 78 Arabinose                                           | Arabinose isomerase (EC 5.3.1.4)                                  | 2662                                                                                               |
| 79 Rhamnose                                            | Rhamnulokinase (EC 2.7.1.5)                                       | 598, 3245                                                                                          |
| 80 Rhamnose                                            | Fuculose-1-phosphate aldolase (EC 4.1.2.17)                       | 594                                                                                                |
| 42 Lactaldehyde to lactate (from rhamnose)             | Aldehyde dehydrogenase (EC 1.2.1.3)                               | 1435                                                                                               |
| Fucose                                                 | Fucose permease                                                   | 3221                                                                                               |
| Fucose                                                 | alpha-L-fucosidase (EC 3.2.1.51)                                  | 157, 1328                                                                                          |
| Fucose                                                 | L-fucose mutarotase                                               | 406                                                                                                |
| Fucose                                                 | L-fucose isomerase (EC 5.3.1.25)                                  | 1381                                                                                               |
| 90 Lysine degradation                                  | Fructoselysine-6-kinase                                           | 3480                                                                                               |
| 91 Lysine degradation                                  | Fructoselysine-6-P-deglycase                                      | 3477, 3486                                                                                         |
| 81 Lysine degradation                                  | Lysine decarboxylase (EC 4.1.1.18)                                | 2157                                                                                               |
| 82 Lysine degradation                                  | Lysine 2,3-aminomutase (EC 5.4.3.2)                               | 5062, 5208                                                                                         |
| 83 Lysine degradation                                  | L-beta-lysine 5,6-aminomutase alpha subunit (EC 5.4.3.3)          | 5211                                                                                               |
| 83 Lysine degradation                                  | L-beta-lysine 5,6-aminomutase beta subunit (EC 5.4.3.3)           | 5212                                                                                               |
| 84 Lysine degradation                                  | L-erythro-3,5-diaminohexanoate dehydrogenase (EC 1.4.1.11)        | 5207                                                                                               |
| 85 Lysine degradation                                  | 3-keto-5-aminothexanoate cleavage enzyme (EC 2.3.1.247)           | 5204                                                                                               |
| 86 Lysine degradation                                  | 3-aminobutyryl-CoA ammonia-lyase (EC 4.3.1.14)                    | 5203                                                                                               |
| 92 Histidine degradation                               | Histidine ammonia-lyase (EC 4.3.1.3)                              | 478                                                                                                |
| 93 Histidine degradation                               | Urocanate hydratase (EC 4.2.1.49)                                 | 477                                                                                                |
| 94 Histidine degradation                               | Imidazolonepropionase (EC 3.5.2.7)                                | 475                                                                                                |
| 95 Histidine degradation                               | Glutamate formiminotransferase                                    | 476                                                                                                |

|                                                                    |                                                              |                                    |
|--------------------------------------------------------------------|--------------------------------------------------------------|------------------------------------|
| 87 Glutamate degradation                                           | Glutamate dehydrogenase (EC 1.4.1.2)                         | 2721                               |
| 88 Glutamate degradation                                           | Glutamate dehydrogenase (EC 1.4.1.4)                         | 2459                               |
| 103 Glutamate degradation                                          | Methylaspartate mutase (EC 5.4.99.1)                         | 5247, 5248, 5249                   |
| 104 Glutamate degradation                                          | Methylaspartate ammonia-lyase (EC 4.3.1.2)                   | 5250, 5251                         |
| 105 Glutamate degradation                                          | Fumarate hydratase I (EC 4.2.1.2)                            | 2140, 2141                         |
| 96 Threonine degradation                                           | Threonine dehydrogenase (EC 1.1.1.103)                       | 1336, 2821, 739                    |
| 97 Threonine degradation                                           | 2-amino-3-ketobutyrate coenzyme A ligase( EC 2.3.2.29)       | 2820                               |
| 98 Glycine cleavage system                                         | Glycine dehydrogenase P1 (EC 1.4.4.2)                        | 4692                               |
| 98 Glycine cleavage system                                         | Glycine dehydrogenase P2 (EC 1.4.4.2)                        | 4691                               |
| 99 Glycine cleavage system                                         | Aminomethyltransferase (EC 2.1.2.10)                         | 4694                               |
| 100 Glycine cleavage system                                        | Dihydrolipoamide dehydrogenase (EC 1.8.1.4)                  | 949, 4690                          |
| 101 Glycine cleavage system                                        | Glycine cleavage system protein H                            | 4693                               |
| 102 Glycine degradation                                            | Serine hydroxymethyltransferase (EC 2.1.2.1)                 | 4741                               |
| 89 Serine degradation                                              | Serine dehydratase (EC 4.3.1.17)                             | 2156, 2157                         |
| 106 L-Alanine metabolism                                           | Alanine dehydrogenase (EC 1.4.1.1.)                          | 4688                               |
| 107 Glycerol                                                       | Aldehyde reductase (EC 1.1.1.2, 1.1.1.21)                    | 978, 945                           |
| 108 Glycerol                                                       | Aldehyde dehydrogenase (EC 1.2.1.3)                          | 1435                               |
| 109 Glycerol                                                       | Glycerate kinase (EC 2.7.1.31)                               | 575, 938                           |
| Chitin and N-acetylglucosamine utilization                         | Chitinase (EC 3.2.1.14)                                      | 1468, 2556, 2772, 3118, 4199, 5580 |
|                                                                    | Kinase similar to eukaryotic-like N-acetylglucosamine kinase | 3386                               |
| Chitin and N-acetylglucosamine utilization, Sialic Acid Metabolism | N-acetylglucosamine-6-phosphate deacetylase (EC 3.5.1.25)    | 152, 1149, 1401, 2191              |
| Chitin and N-acetylglucosamine utilization                         | Glucosamine-6-phosphate deaminase (EC 3.5.99.6)              | 151, 1400, 2190                    |
| Chitin and N-acetylglucosamine utilization                         | Beta-hexosaminidase (EC 3.2.1.52)                            | 304, 1419, 1950, 3645, 4260, 4717  |
| Methionine degradation                                             | Methionine aminopeptidase (EC 3.4.11.18)                     | 1641, 1736                         |
|                                                                    | S-adenosylmethionine synthetase (EC 2.5.1.6)                 | 1715                               |
|                                                                    | S-adenosylmethionine decarboxylase proenzyme (EC 4.1.1.50)   | 517                                |
|                                                                    | Spermidine synthase (EC 2.5.1.16)                            | 508                                |

#### ABC transporters

|                                                          |                                                                                |                                   |
|----------------------------------------------------------|--------------------------------------------------------------------------------|-----------------------------------|
| ABC Transporter oligopeptide (TC 3.A.1.5.1)              | Oligopeptide transport system permease protein OppC                            | 33, 439, 1303                     |
| ABC Transporter oligopeptide (TC 3.A.1.5.1)              | Oligopeptide transport system permease protein OppB                            | 34, 440, 1304                     |
| ABC Transporter oligopeptide (TC 3.A.1.5.1)              | Oligopeptide transport system permease protein OppF                            | 31, 437, 846, 1301                |
| ABC Transporter oligopeptide (TC 3.A.1.5.1)              | Oligopeptide transport system permease protein OppD                            | 32, 438, 658, 659, 702, 847, 1302 |
| ABC Transporter oligopeptide (TC 3.A.1.5.1)              | Oligopeptide ABC transporter, periplasmic oligopeptide binding protein OppA    | 35, 441, 850, 1305, 4252          |
| ABC Transporter oligopeptide (TC 3.A.1.5.1)              | ABC Transporter ATP-binding protein                                            | 443                               |
| ABC Transporter branched-chain amino acid (TC 3.A.1.4.1) | High-affinity branched-chain amino acid transport system permease protein LivH | 1605                              |
| ABC Transporter branched-chain amino acid (TC 3.A.1.4.1) | Branched-chain amino acid transport ATP-binding protein LivF                   | 1602                              |
| ABC Transporter branched-chain amino acid (TC 3.A.1.4.1) | Branched-chain amino acid transport system permease protein LivM               | 420, 1604                         |
| ABC Transporter branched-chain amino acid (TC 3.A.1.4.1) | Branched-chain amino acid ABC transporter, amino acid binding protein          | 1606                              |
| ABC Transporter branched-chain amino acid (TC 3.A.1.4.1) | Branched-chain amino acid transport ATP binding protein LivG                   | 1603                              |
| ABC Transporter dipeptide (TC 3.A.1.5.2)                 | Dipeptide transport system permease protein DppB                               | 661, 704, 849                     |
| ABC Transporter dipeptide (TC 3.A.1.5.2)                 | Dipeptide transport system permease protein DppF                               | 657                               |
| ABC Transporter dipeptide (TC 3.A.1.5.2)                 | Dipeptide transport system permease protein DppC                               | 703, 848                          |
| Putative Polar amino acid transporter                    | Polar amino acid transport system substrate binding protein                    | 2739,3237, 5056                   |

|                                                                              |                                                                                                   |                                                                                                                    |
|------------------------------------------------------------------------------|---------------------------------------------------------------------------------------------------|--------------------------------------------------------------------------------------------------------------------|
| Putative Polar amino acid transporter                                        | Polar amino acid transport system permease protein                                                | 2740, 3238, 5055                                                                                                   |
| Putative Polar amino acid transporter                                        | Polar amino acid transport system ATP-binding protein (EC 3.6.3.21)                               | 2741, 3239, 5054                                                                                                   |
| Putative sugar ABC transporter (ytf cluster)                                 | Putative sugar ABC transport system, periplasmic binding protein YtfQ precursor                   | 4161, 2002, 1995, 4161                                                                                             |
| Putative sugar ABC transporter (ytf cluster)                                 | Putative sugar ABC transport system, permease protein YtfF                                        | 1999                                                                                                               |
| Putative sugar ABC transporter (ytf cluster)                                 | Putative sugar ABC transport system, ATP-binding protein YtfR (EC 3.6.3.21)                       | 1997                                                                                                               |
| Putative sugar ABC transporter (ytf cluster)                                 | Permease protein (YtfT)                                                                           | 1998                                                                                                               |
|                                                                              | Permease protein (YtfF)                                                                           | 1999                                                                                                               |
| D-ribose utilization                                                         | Ribose ABC transport system, ATP-binding protein RbsA (TC 3.A.1.2.1)                              | 421, 464, 1991, 2838, 4089, 4154, 4151, 4291, 3286, 1429, 455, 597, 411, 2838, 3286, 4089, 4154, 4291              |
| D-ribose utilization                                                         | Ribose ABC transport system, permease protein RbsC (TC 3.A.1.2.1)                                 | 455, 1990, 4088, 4155, 4289, 4290, 3287, 1428, 5094, 3428, 596, 409, 410, 3287, 3428, 4088, 4155, 4289, 4290, 5094 |
| D-ribose utilization                                                         | Ribose ABC transport system, high affinity permease RbsD (TC 3.A.1.2.1)                           | 1430                                                                                                               |
| D-ribose utilization                                                         | Ribose ABC transport system, periplasmic ribose-binding protein RbsB (TC 3.A.1.2.1)               | 1427, 403, 2110, 595, 408, 413                                                                                     |
| D-ribose utilization                                                         | Ribose/xylose/arabinose/galactoside ABC-type transport systems, permease component                | 1989                                                                                                               |
| D-ribose utilization                                                         | Ribose/xylose/arabinose/galactoside ABC-type transport systems, periplasmic sugar binding protein | 1993                                                                                                               |
| Xylose utilization                                                           | Xylose ABC transporter, substrate-binding component                                               | 3285, 1423, 3429, 1752, 2825, 3285, 3429, 3641                                                                     |
| Xylose utilization                                                           | Xylose ABC transporter, periplasmic xylose-binding protein XylF                                   | 2106, 2107                                                                                                         |
| Xylose utilization                                                           | D-xylose transport ATP-binding protein XylG                                                       | 2105                                                                                                               |
| Xylose utilization                                                           | Xylose ABC transporter, permease component                                                        | 683, 1741, 2443, 2572, 2826, 2906, 3403, 3404, 3642, 4345, 4576, 4726, 5219                                        |
| Xylose utilization                                                           | Sugar ABC transporter permease protein ycjP                                                       | 682                                                                                                                |
| Xylose utilization                                                           | ABC transporter, substrate-binding protein                                                        | 681                                                                                                                |
| Xylose utilization                                                           | Probable ABC transporter permease protein ytcP                                                    | 1740, 4344                                                                                                         |
| Xylose utilization                                                           | Possible alpha-xyloside ABC transporter, permease component                                       | 3213                                                                                                               |
| Inositol catabolism                                                          | Inositol transport system sugar-binding protein                                                   | 401                                                                                                                |
| Inositol catabolism                                                          | Inositol transport system ATP-binding protein                                                     | 3430                                                                                                               |
|                                                                              | Inositol transport system permease protein                                                        | 399                                                                                                                |
| Fructooligosaccharides(FOS) and Raffinose Utilization                        | Multiple sugar ABC transporter, substrate-binding protein                                         | 1090, 1617, 4423                                                                                                   |
|                                                                              | Multiple sugar ABC transporter, membrane-spanning permease protein MsmG                           | 1091                                                                                                               |
|                                                                              | Multiple sugar ABC transporter, membrane-spanning permease protein MsmF                           | 1092, 1618                                                                                                         |
| Maltose and Maltodextrin Utilization                                         | Maltose/maltodextrin ABC transporter, permease protein MalG                                       | 1619, 1979, 2189, 2400, 3689, 3966, 4941, 5289                                                                     |
| Maltose and Maltodextrin Utilization                                         | Maltose/maltodextrin ABC transporter, permease protein MalF                                       | 1980, 2188, 2399, 2648, 3688, 3965, 4942                                                                           |
| Maltose and Maltodextrin Utilization                                         | Maltose/maltodextrin ABC transporter, substrate binding periplasmic protein MalE                  | 1981, 2028, 2397, 2854, 3964, 4943, 5335                                                                           |
| Maltose and Maltodextrin Utilization                                         | maltose/maltodextrin transport permease                                                           | 2444, 2573, 4575                                                                                                   |
|                                                                              | Polysaccharide ABC transporter substrate-binding protein                                          | 2445                                                                                                               |
| Fructooligosaccharides(FOS) and Raffinose Utilization, Maltose : Utilization | Multiple sugar ABC transporter, ATP-binding protein                                               | 2881                                                                                                               |
| Glycerol and Glycerol-3-phosphate Uptake and Utilization                     | Glycerol-3-phosphate ABC transporter, ATP-binding protein UgpC (TC 3.A.1.1.3)                     | 2401, 3690                                                                                                         |
| L-Arabinose utilization                                                      | L-arabinose transport system permease protein (TC 3.A.1.2.2)                                      | 2104                                                                                                               |
| Lactose and Galactose Uptake and Utilization                                 | Galactose/methyl galactoside ABC transport system, ATP-binding protein MglA (EC 3.6.3.21)         | 3550, 400, 456                                                                                                     |
| Lactose and Galactose Uptake and Utilization                                 | D-galactose-binding periplasmic protein MglB (TC 3.A.1.2.3)                                       | 3549                                                                                                               |
| Lactose and Galactose Uptake and Utilization                                 | Galactose/methyl galactoside ABC transport system, permease protein MglC (TC 3.A.1.3)             | 3551                                                                                                               |
| Bacterial Chemotaxis, Lactose and Galactose Uptake and Utilization           | Galactose/methyl galactoside ABC transport system, D-galactose-binding periplasmic protein        | 3549                                                                                                               |
| Lactose and Galactose Uptake and Utilization                                 | Galactose/methyl galactoside ABC transport system, ATP-binding protein MglA (EC 3.6.3.21)         | 3550                                                                                                               |
| Lactose and Galactose Uptake and Utilization                                 | Galactose/methyl galactoside ABC transport system, permease protein MglC (TC 3.A.1.3)             | 3551                                                                                                               |

|                                                          |                                                                                       |                                                                                                                             |
|----------------------------------------------------------|---------------------------------------------------------------------------------------|-----------------------------------------------------------------------------------------------------------------------------|
| ABC type sugar transport systems                         | Permease component                                                                    | 1422                                                                                                                        |
|                                                          | Permease                                                                              | 1421                                                                                                                        |
| Various polyols ABC trnsporter                           | Periplasmic component                                                                 | 5093                                                                                                                        |
|                                                          | ATP binding component                                                                 | 5095                                                                                                                        |
| Fructose utilization                                     | Fructose ABC transporter, substrate-binding component FrcB                            | 454                                                                                                                         |
|                                                          |                                                                                       |                                                                                                                             |
| Nucleoside ABC transporter                               | periplasmic nucleoside-binding protein                                                | 2837, 2013, 2143                                                                                                            |
|                                                          | Permease protein 1                                                                    | 2839, 2015, 2145                                                                                                            |
|                                                          | Permease protein 2                                                                    | 2840, 2016, 2146                                                                                                            |
| ABC transporter                                          | ATP-binding protein                                                                   | 425, 2014                                                                                                                   |
| ABC sugar transporter                                    | periplasmic binding protein                                                           | 4295                                                                                                                        |
| Unspecified monosaccharide ABC transport system          | ATP- binding protein                                                                  | 2144                                                                                                                        |
| Fructooligosaccharides(FOS) and Raffinose Utilization    | Multiple sugar ABC transporter, membrane-spanning permease protein MsmG               | 159, 1365, 2078, 2182, 2471, 2766, 3253, 3392, 3455, 3838, 4420, 4631, 4639, 4835, 5081                                     |
| Fructooligosaccharides(FOS) and Raffinose Utilization    | Multiple sugar ABC transporter, membrane-spanning permease protein MsmF               | 160, 1366, 2181, 2470, 2488, 2765, 3454, 3837, 4632, 4640, 4836, 5082                                                       |
| Fructooligosaccharides(FOS) and Raffinose Utilization    | Multiple sugar ABC transporter, substrate-binding protein                             | 161, 1364, 2076, 2473, 2491, 2764, 3453, 3481, 3836, 4630, 4638, 4834, 5079                                                 |
| Fructooligosaccharides(FOS) and Raffinose Utilization    | Multiple sugar ABC transporter, ATP-binding protein                                   | 2881, 3691                                                                                                                  |
|                                                          |                                                                                       |                                                                                                                             |
| Chitin and N-acetylglucosamine utilization               | N-Acetyl-D-glucosamine ABC transport system, permease protein 2                       | 559, 1463, 1513, 1585, 1957, 2031, 2090, 2267, 2749, 3149, 3269, 4407, 5187                                                 |
| Chitin and N-acetylglucosamine utilization               | N-Acetyl-D-glucosamine ABC transport system, permease protein 1                       | 561, 1013, 1464, 1514, 1582, 1586, 1958, 2032, 2077, 2091, 2269, 2748, 3149, 3628, 3608, 4409, 4421, 5186, 5288, 5321, 5336 |
| Chitin and N-acetylglucosamine utilization               | ABC transport system, sugar-binding protein                                           | 562, 1014, 1465, 1515, 1587, 1959, 2013, 2092, 2180, 2270, 2740, 3147, 3267, 3511, 4411, 5185                               |
|                                                          | Putative sugar ABC transporter                                                        | 1012                                                                                                                        |
| Chitin and N-acetylglucosamine utilization               | Predicted chitobiose ABC transport system II, sugar-binding protein                   | 2647                                                                                                                        |
| Chitin and N-acetylglucosamine utilization               | N-Acetyl-D-glucosamine ABC transport system, permease protein                         | 3507                                                                                                                        |
|                                                          |                                                                                       |                                                                                                                             |
| Glycerol and Glycerol-3-phosphate Uptake and Utilization | Glycerol-3-phosphate ABC transporter, periplasmic glycerol-3-phosphate-binding protei | 2187, 3610                                                                                                                  |
| Glycerol and Glycerol-3-phosphate Uptake and Utilization | Probable glycerol transport protein                                                   | 2855                                                                                                                        |
|                                                          |                                                                                       |                                                                                                                             |
| No category                                              | ABC-type multidrug transport system, ATPase component                                 | 2492                                                                                                                        |
| No category                                              | ABC-type transport system involved in multi-copper enzyme maturation, permease con    | 2493                                                                                                                        |
| No category                                              | ATP-binding protein of ABC transporter                                                | 2549, 2551                                                                                                                  |
| No category                                              | ABC-type polysaccharide transport system, permease component                          | 726, 2552, 3212, 3253, 3508                                                                                                 |
| No category                                              | ABC transporter, permease protein                                                     | 2490, 2553, 2907, 3393, 4703                                                                                                |
| No category                                              | ABC transporter, substrate-binding protein                                            | 723, 2554, 2908, 3211, 3391, 3405, 4577, 4724                                                                               |
| No category                                              | ABC transporter, membrane spanning protein                                            | 2649                                                                                                                        |
| No category                                              | sugar ABC transporter permease                                                        | 1421, 2827, 3643                                                                                                            |
| No category                                              | Nucleoside ABC transporter, periplasmic nucleoside-binding protein                    | 2837                                                                                                                        |
| No category                                              | Nucleoside ABC transporter, permease protein 1                                        | 2839                                                                                                                        |
| No category                                              | Nucleoside ABC transporter, permease protein 2                                        | 2840                                                                                                                        |
| No category                                              | Glycine betaine ABC transport system, glycine betaine-binding protein OpuAC           | 2861                                                                                                                        |
| No category                                              | ABC transporter permease component                                                    | 3609                                                                                                                        |
| No category                                              | Predicted erythritol ABC transporter 1, substrate-binding component                   | 3687                                                                                                                        |
| No category                                              | Sugar ABC transporter                                                                 | 4090                                                                                                                        |
| No category                                              | ABC transporter, ATP-binding protein                                                  | 4151, 4702, 4705                                                                                                            |
| No category                                              | ABC sugar transporter, periplasmic binding protein                                    | 4295                                                                                                                        |
| No category                                              | Probable ABC transporter permease protein ytcP                                        | 4725, 5220                                                                                                                  |
| No category                                              | similar to ABC-type sugar transport system periplasmic component                      | 5093                                                                                                                        |
| No category                                              | Various polyols ABC transporter, ATP-binding component                                | 5095                                                                                                                        |
| No category                                              | ABC transport system, sugar-binding protein                                           | 5320                                                                                                                        |
| No category                                              | ABC-type sugar transport system, permease component                                   | 5337                                                                                                                        |
| No category                                              | Possible fucose ABC transporter, permease component                                   | 463                                                                                                                         |

|                         |                                                                          |            |
|-------------------------|--------------------------------------------------------------------------|------------|
| No category             | Possible fucose ABC transporter, substrate-binding component             | 461, 465   |
| No category             | putative sugar ABC transporter permease                                  | 725        |
| Inositol catabolism     | 5-keto-2-deoxygluconokinase (EC 2.7.1.92)                                | 1000       |
| Inositol catabolism     | Inositol transport system, Permease protein                              | 1001, 399  |
| Inositol catabolism     | Inositol transport system, ATP-binding protein                           | 1002, 3430 |
| Inositol catabolism     | Inositol transport system, Sugar binding protein                         | 1003, 401  |
| Inositol catabolism     | Epi-inositol hydrolase (3.7.1.-)                                         | 1004       |
| Inositol catabolism     | Inosose dehydratase (EC 4.2.1.44)                                        | 1005, 1007 |
| Inositol catabolism     | 5-deoxyglururonate isomerase (EC 5.3.1.30)                               | 1006       |
| Inositol catabolism     | Myo-Inositol dehydrogenase (EC 1.1.1.18)                                 | 1008, 397  |
| Inositol catabolism     | Inosose isomerase (EC 5.3.99.-)                                          | 398        |
| L-Arabinose utilization | Ribulokinase (EC 2.7.1.16)                                               |            |
| L-Arabinose utilization | L-arabinose transport system permease protein (TC 3.A.1.2.2)             |            |
| L-Arabinose utilization | L-arabinose isomerase (EC 5.3.1.4)                                       |            |
| L-Arabinose utilization | Transcriptional repressor of arabinoside utilization operon, GntR family |            |
| L-Arabinose utilization | Alpha-L-arabinofuranosidase II precursor (EC 3.2.1.55)                   |            |

#### Proteases and peptidases

|                                                                  |                                                                                      |                  |
|------------------------------------------------------------------|--------------------------------------------------------------------------------------|------------------|
|                                                                  | alkaline serine protease                                                             | 3934             |
|                                                                  | Transglutaminase-like enzyme, putative cysteine protease                             | 4118             |
| A cluster relating to Tryptophanyl-tRNA synthetase               | FIG004556: membrane metalloprotease                                                  | 4119             |
|                                                                  | Protease (EC 3.4.-.-)                                                                | 1113, 1122, 4215 |
| DNA repair, bacterial                                            | SOS-response repressor and protease LexA (EC 3.4.21.88)                              | 4276             |
|                                                                  | Secreted protease metal-dependent protease                                           | 4309             |
| Phosphoglycerate mutase protein family                           | Carboxyl-terminal protease (EC 3.4.21.102)                                           | 145, 1750, 2886  |
| Small acid-soluble spore proteins                                | Endopeptidase spore protease Gpr (EC 3.4.24.78)                                      | 289              |
|                                                                  | Spore protease GPR related protein                                                   | 2244             |
| Proteolysis in bacteria, ATP-dependent                           | ATP-dependent protease La (EC 3.4.21.53) Type I                                      | 1295             |
| Proteolysis in bacteria, ATP-dependent                           | ATP-dependent Clp protease ATP-binding subunit ClpX                                  | 1296, 5504       |
| Proteolysis in bacteria, ATP-dependent, cAMP signaling in bacter | ATP-dependent Clp protease proteolytic subunit (EC 3.4.21.92)                        | 1297             |
| Proteolysis in bacteria, ATP-dependent                           | ATP-dependent Clp protease, ATP-binding subunit ClpC / Negative regulator of genetic | 3573             |
|                                                                  | Putative stomatin/prohibitin-family membrane protease subunit PA4582                 | 1461             |
|                                                                  | Putative stomatin/prohibitin-family membrane protease subunit YbbK                   | 1561             |
|                                                                  | Putative activity regulator of membrane protease YbbK                                | 1562             |
|                                                                  | FIG056164: rhomboid family serine protease                                           | 1912             |
|                                                                  | CAAX amino terminal protease family protein                                          | 2061, 2293       |
|                                                                  | Alpha-lytic protease precursor (EC 3.4.21.12) (Alpha-lytic endopeptidase)            | 2310             |
| SA:14-24                                                         | Serine protease, DegP/HtrA, do-like (EC 3.4.21.-)                                    | 2503             |
| Proteolysis in bacteria, ATP-dependent                           | ATP-dependent protease La (EC 3.4.21.53) Type II                                     | 2936             |
|                                                                  | Protease precursor                                                                   | 3739             |
|                                                                  | Membrane-associated zinc metalloprotease                                             | 4454             |
|                                                                  | Hydrogenase maturation protease delta subunit, HyaD-like                             | 4596             |
|                                                                  | putative metal-dependent membrane protease                                           | 4884             |

|                                                                  |                                                                                         |                                                     |
|------------------------------------------------------------------|-----------------------------------------------------------------------------------------|-----------------------------------------------------|
| Proteolysis in bacteria, ATP-dependent, Ribosome recycling relat | ATP-dependent Clp protease ATP-binding subunit ClpA                                     | 5051                                                |
|                                                                  | Cell wall-associated protease precursor (EC 3.4.21.-)                                   | 5469                                                |
| CBSS-84588.1.peg.1247, Metallo-carboxypeptidases (EC 3.4.17.-),  | D-alanyl-D-alanine carboxypeptidase (EC 3.4.16.4)                                       | 41, 4110, 4122, 4223,                               |
|                                                                  | Peptidase, M20/M25/M40 family                                                           | 147                                                 |
| Protein degradation                                              | Aminopeptidase YpdF (MP-, MA-, MS-, AP-, NP- specific)                                  | 224                                                 |
|                                                                  | peptidase, U32 family large subunit [C1]                                                | 266                                                 |
|                                                                  | Oligoendopeptidase F (EC 3.4.24.-)                                                      | 590                                                 |
| Aminopeptidases (EC 3.4.11.-)                                    | Cytosol aminopeptidase PepA (EC 3.4.11.1)                                               | 110                                                 |
| CBSS-176299.4.peg.1292, Signal peptidase                         | Signal peptidase I (EC 3.4.21.89)                                                       | 909                                                 |
|                                                                  | Aspartyl aminopeptidase (EC 3.4.11.21)                                                  | 924                                                 |
| Peptidoglycan Biosynthesis                                       | Multimodular transpeptidase-transglycosylase (EC 2.4.1.129) (EC 3.4.-.-)                | 1030, 1031                                          |
| Muramoyltetrapeptide carboxypeptidase (EC 3.4.17.13)             | Muramoyltetrapeptide carboxypeptidase (EC 3.4.17.13)                                    | 1219                                                |
| Metalloendopeptidases (EC 3.4.24.-)                              | Microbial collagenase (EC 3.4.24.3)                                                     | 1348                                                |
| Aminopeptidases (EC 3.4.11.-)                                    | Xaa-Pro aminopeptidase (EC 3.4.11.9)                                                    | 1393                                                |
| CBSS-312309.3.peg.1965, Translation termination factors bacteri  | Methionine aminopeptidase (EC 3.4.11.18)                                                | 1641, 1736                                          |
| CBSS-393121.3.peg.2760                                           | Membrane proteins related to metalloendopeptidases                                      | 711, 1724, 2049, 2501, 2885, 3460, 5414, 5600, 5613 |
| CBSS-176299.4.peg.1292, Signal peptidase                         | Signal peptidase I (EC 3.4.21.89)                                                       | 1775, 4012                                          |
| CBSS-393121.3.peg.2760                                           | Peptidase, M23/M37 family                                                               | 1861, 1886                                          |
|                                                                  | Aminopeptidase Y (EC 3.4.11.-)                                                          | 2095                                                |
| Heat shock dnaK gene cluster extended                            | Signal peptidase-like protein                                                           | 2152                                                |
|                                                                  | Oligoendopeptidase F (EC 3.4.24.-)                                                      | 2250                                                |
|                                                                  | Alpha-lytic protease precursor (EC 3.4.21.12) (Alpha-lytic endopeptidase)               | 2310                                                |
|                                                                  | aminopeptidase                                                                          | 2338                                                |
|                                                                  | Deblocking aminopeptidase (EC 3.4.11.-)                                                 | 2342                                                |
|                                                                  | Peptidase, S41 family                                                                   | 2714, 3462                                          |
|                                                                  | Oligoendopeptidase F (EC 3.4.24.-)                                                      | 3578                                                |
| CBSS-84588.1.peg.1247, Metallo-carboxypeptidases (EC 3.4.17.-),  | D-alanyl-D-alanine carboxypeptidase (EC 3.4.16.4)                                       | 3101                                                |
|                                                                  | Leader peptidase (Prepilin peptidase) (EC 3.4.23.43) / N-methyltransferase (EC 2.1.1.-) | 3189                                                |
| Peptidoglycan Biosynthesis                                       | Multimodular transpeptidase-transglycosylase (EC 2.4.1.129) (EC 3.4.-.-)                | 3649                                                |
|                                                                  | Tripeptide aminopeptidase (EC 3.4.11.4)                                                 | 3650                                                |
|                                                                  | Zn-dependent peptidase, insulinase family                                               | 3854                                                |
|                                                                  | probable metal-dependent peptidase                                                      | 3977                                                |
| CBSS-1806.1.peg.3045, CBSS-350688.3.peg.1509                     | FIG007959: peptidase, M16 family                                                        | 4042                                                |
| Metallo-carboxypeptidases (EC 3.4.17.-), Murein Hydrolases, Recy | Muramoyltetrapeptide carboxypeptidase (EC 3.4.17.13)                                    | 4055                                                |
|                                                                  | similar to sp:LSA_STACA LIPOPROTEIN SIGNAL PEPTIDASE (EC 3.4.23.36) (PROLIPOPR          | 4174                                                |
| Metallo-carboxypeptidases (EC 3.4.17.-)                          | Thermostable carboxypeptidase 1 (EC 3.4.17.19)                                          | 4200                                                |
| Dipeptidases (EC 3.4.13.-), Recycling of Peptidoglycan Amino Aci | Aminoacyl-histidine dipeptidase (Peptidase D) (EC 3.4.13.3)                             | 4258                                                |
| Lipoprotein Biosynthesis, Signal peptidase                       | Lipoprotein signal peptidase (EC 3.4.23.36)                                             | 4333, 4892                                          |
|                                                                  | Gamma-D-glutamyl-L-diamino acid endopeptidase I (EC 3.4.19.11)                          | 4352                                                |
|                                                                  | Cell wall endopeptidase, family M23/M37                                                 | 4449                                                |
| Sporulation gene orphans                                         | Sporulation sigma-E factor processing peptidase (SpoIIIGA)                              | 4514                                                |

## Hydrogenases

|                                                                                                                                 |                                                          |            |
|---------------------------------------------------------------------------------------------------------------------------------|----------------------------------------------------------|------------|
| G3E family of P-loop GTPases (metallocenter biosynthesis), NiFe [NiFe] hydrogenase metallocenter assembly protein HypE          | 4591                                                     |            |
| G3E family of P-loop GTPases (metallocenter biosynthesis), NiFe [NiFe] hydrogenase metallocenter assembly protein HypD          | 4592                                                     |            |
| G3E family of P-loop GTPases (metallocenter biosynthesis), NiFe [NiFe] hydrogenase metallocenter assembly protein HypC          | 4593                                                     |            |
| G3E family of P-loop GTPases (metallocenter biosynthesis), NiFe [NiFe] hydrogenase metallocenter assembly protein HypF          | 4594                                                     |            |
| G3E family of P-loop GTPases (metallocenter biosynthesis), NiFe [NiFe] hydrogenase nickel incorporation-associated protein HypB | 2579                                                     |            |
| G3E family of P-loop GTPases (metallocenter biosynthesis), NiFe [NiFe] hydrogenase nickel incorporation protein HypA            | 2581                                                     |            |
| Hydrogenases                                                                                                                    | Hydrogenase maturation protease delta subunit, HyaD-like | 4596       |
| Hydrogenases                                                                                                                    | [Ni/Fe] hydrogenase, group 1, large subunit              | 4597, 4599 |
| Hydrogenases                                                                                                                    | [FeFe]-hydrogenase maturation protein HydE               | 138        |

|              |                                                          |                     |
|--------------|----------------------------------------------------------|---------------------|
| Hydrogenases | [FeFe]-hydrogenase maturation protein HydF               | 4381                |
| Hydrogenases | Periplasmic [Fe] hydrogenase large subunit (EC 1.12.7.2) | 95,2068, 2901, 3896 |
| Hydrogenases | Periplasmic [Fe] hydrogenase (EC 1.12.7.2)               | 96, 98, 4378        |
| Hydrogenases | NAD-reducing hydrogenase subunit HoxE (EC 1.12.1.2)      | 2066, 2898, 3894    |
| Hydrogenases | NAD-reducing hydrogenase subunit HoxF (EC 1.12.1.2)      | 2067, 2900, 3895    |
| Hydrogenases | NADP-reducing hydrogenase, subunit B                     | 2899                |

| Flagella           |                                                                                           |                 |
|--------------------|-------------------------------------------------------------------------------------------|-----------------|
|                    | RNA polymerase sigma factor for flagellar operon                                          | 4466            |
| Flagellar motility | Signal transduction histidine kinase CheA (EC 2.7.3.-)                                    | 4471, 1402      |
| Flagellar motility | Flagellar synthesis regulator FleN                                                        | 4474            |
| Flagellar motility | Flagellar biosynthesis protein FlhF                                                       | 4475            |
| Flagellar motility | Flagellar biosynthesis protein FlhA                                                       | 4476            |
| Flagellar motility | Flagellar biosynthesis protein FlhB                                                       | 4477, 4017      |
| Flagellar motility | Flagellar biosynthesis protein FliR                                                       | 4478            |
| Flagellar motility | Chemotaxis regulator - transmits chemoreceptor signals to flagellar motor components CheY | 4482, 4418, 279 |
| Flagellar motility | Flagellar motor switch protein FliN                                                       | 4483            |
| Flagellar motility | Flagellar motor switch protein FliM                                                       | 4484            |
| Flagellar motility | Flagellar motor rotation protein MotA                                                     | 4487            |
| Flagellar motility | Flagellar basal-body rod modification protein FlgD                                        | 4491            |
| Flagellar motility | Flagellum-specific ATP synthase FliI                                                      | 4495            |
| Flagellar motility | Flagellin                                                                                 | 1684            |

| Polyketid biosynthetic cluster |                             |                           |      |
|--------------------------------|-----------------------------|---------------------------|------|
|                                | Start (gene number in RAST) | End (gene number in RAST) |      |
|                                | 1                           | 4638                      | 4674 |
|                                | 2                           | 4868                      | 4879 |
|                                | 3                           | 4883                      | 4940 |
|                                | 4                           | 328                       | 363  |
|                                | 5                           | 1095                      | 1192 |
|                                | 6                           | 1389                      | 1409 |
|                                | 7                           | 1504                      | 1536 |
|                                | 8                           | 2596                      | 2652 |
|                                | 9                           | 3299                      | 3348 |
