# Supplementary figures and images for: Genome Analysis of Vallitalea guaymasensis Strain L81 Isolated from a Deep-Sea Hydrothermal Vent System
Source: MDPI journal article supplement (doi:10.3390/microorganisms6030063), 2018-07-04

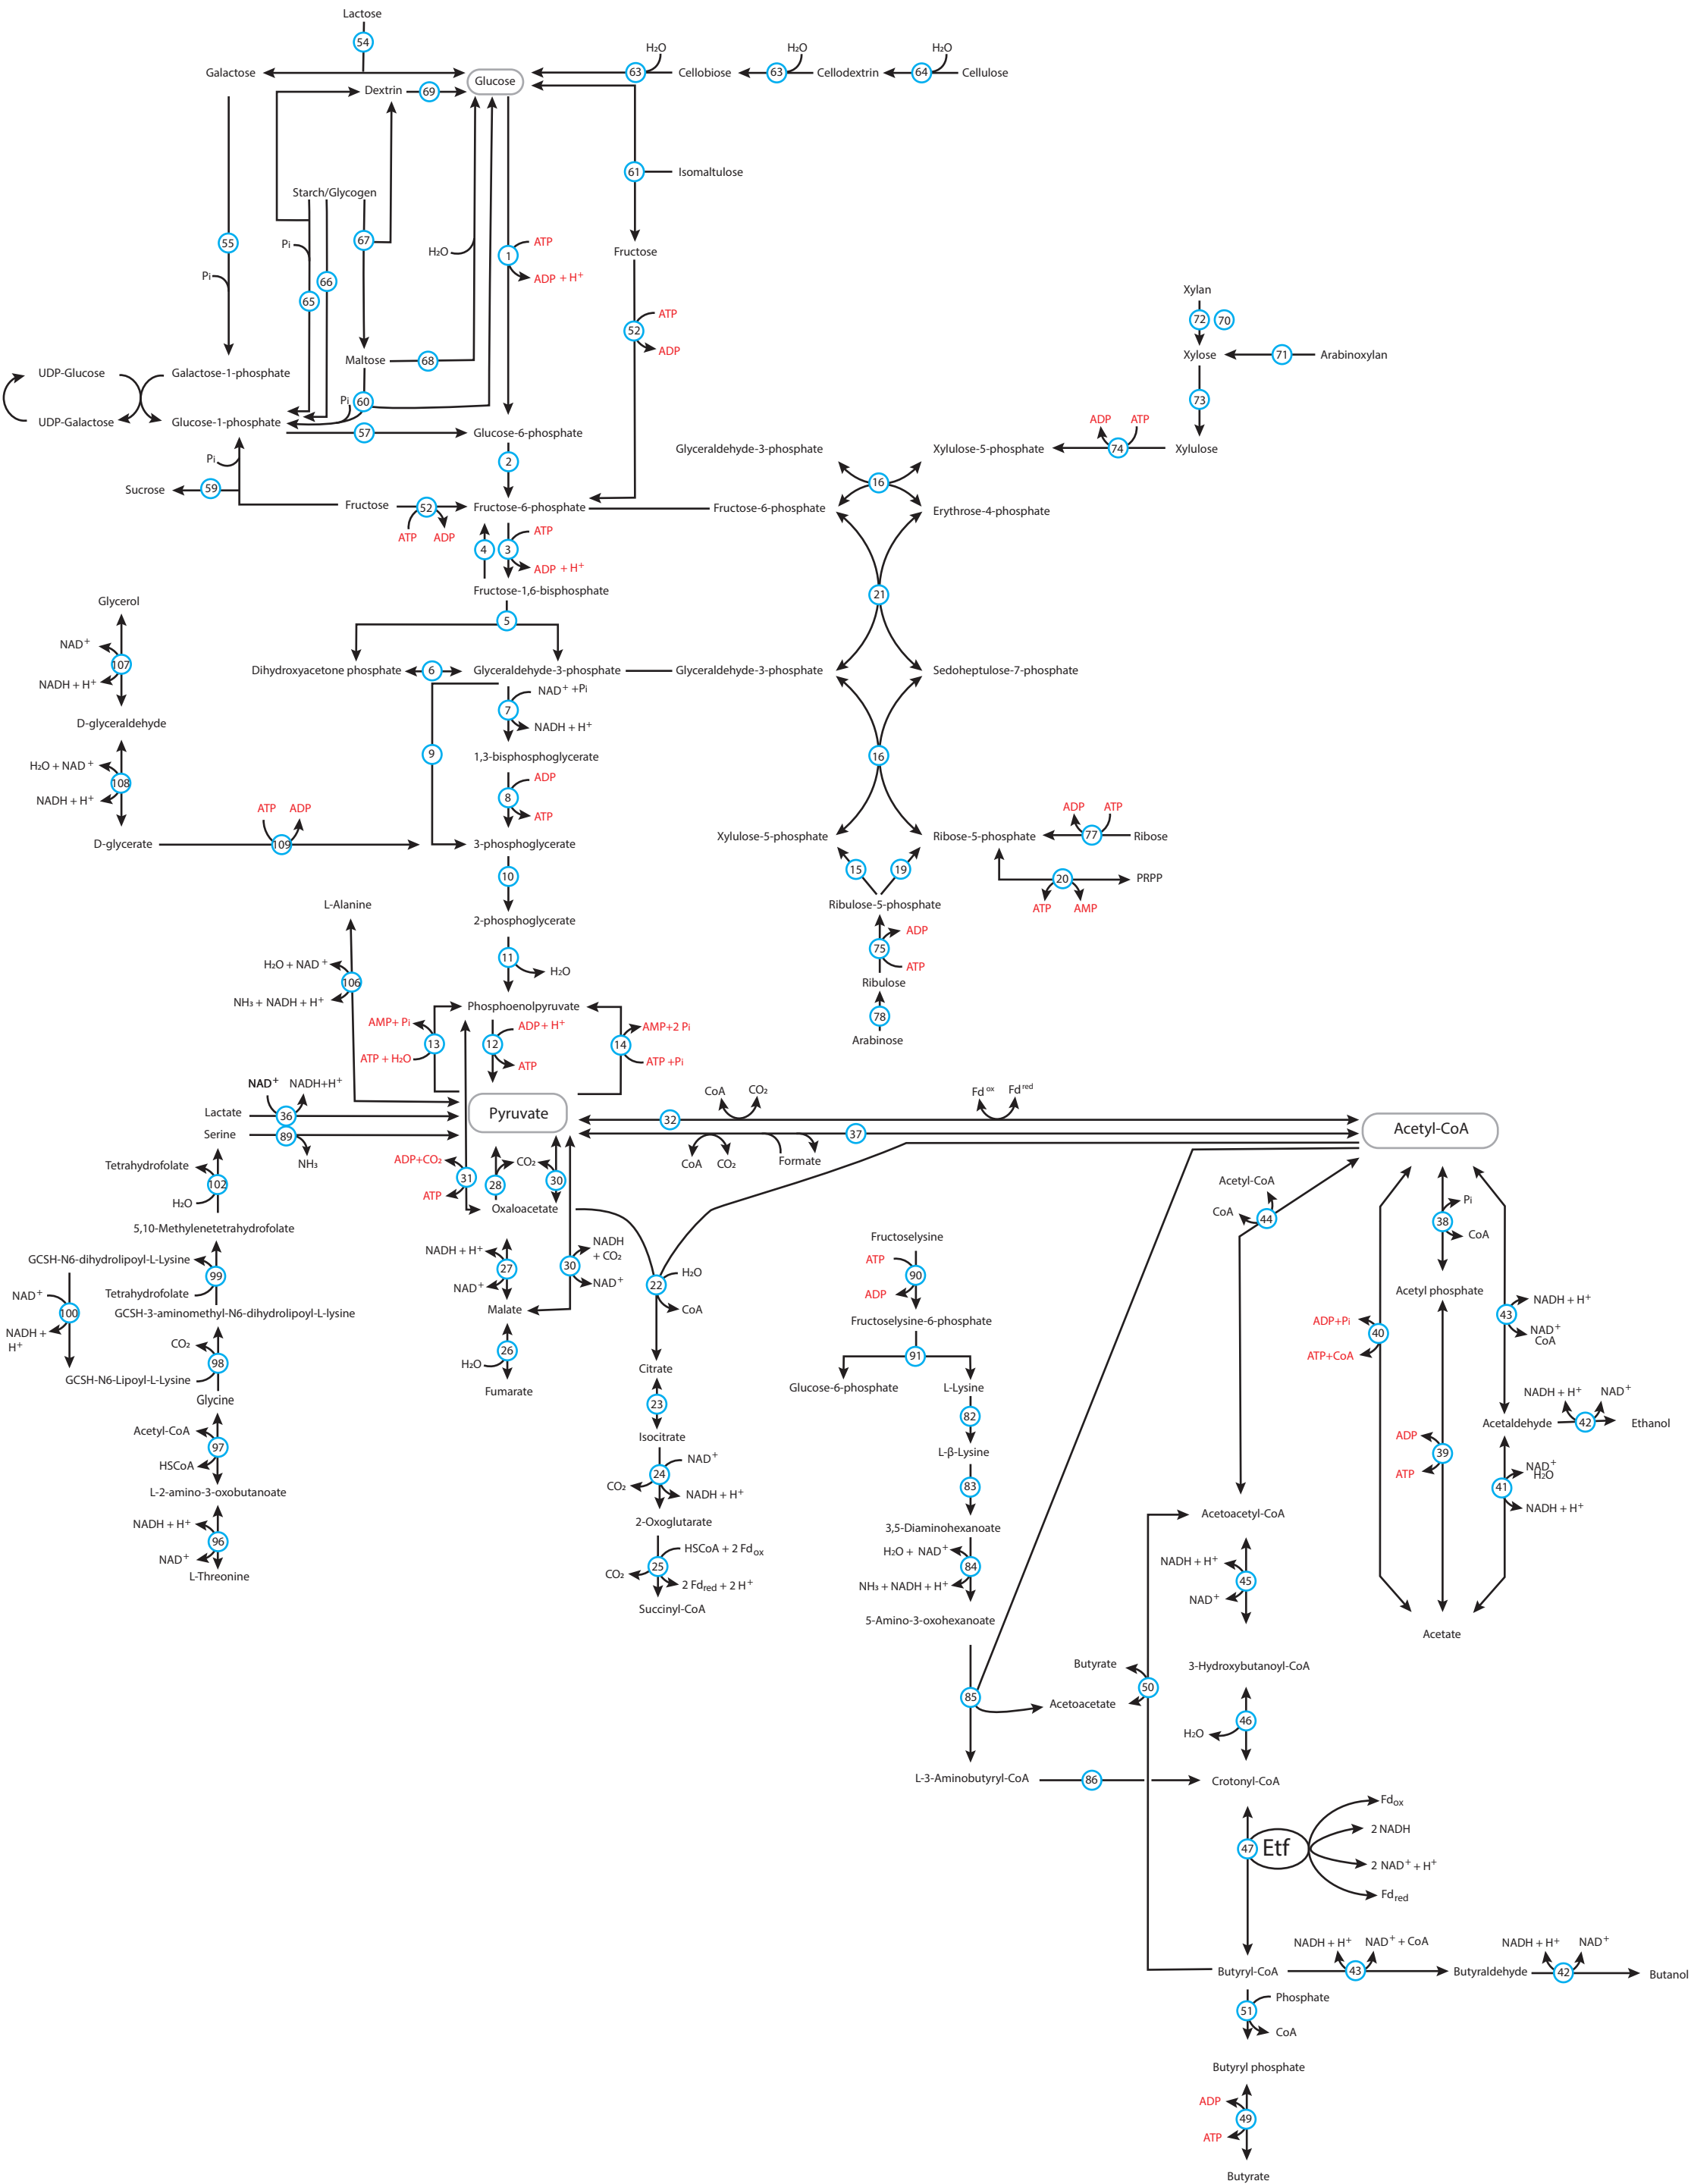

Supplement: s1 [file s1]
